# Supplementary material for: Impact of Heterogeneity in Sexual Behavior on Effectiveness in Reducing HIV Transmission with Test-and-Treat Strategy
Source: PubMed Central journal article supplement (PMC4968843; doi:10.1371/journal.pcbi.1005012), 2016-08-01

**Time-dependent behavior of the model variables for the default parameter values with ART.** The results are for the total number of susceptible individuals,  $S(t)$ , total number of untreated infected individuals,  $I(t)$ , total number of treated individuals,  $A(t)$ , total population size,  $N(t)$ , and population sizes of the lowest,  $N_1(t)$ , and highest,  $N_6(t)$ , risk groups. The annual treatment uptake percentage,  $\tau^*$ , is 80% and the rest of parameter values are as in S1 Table.

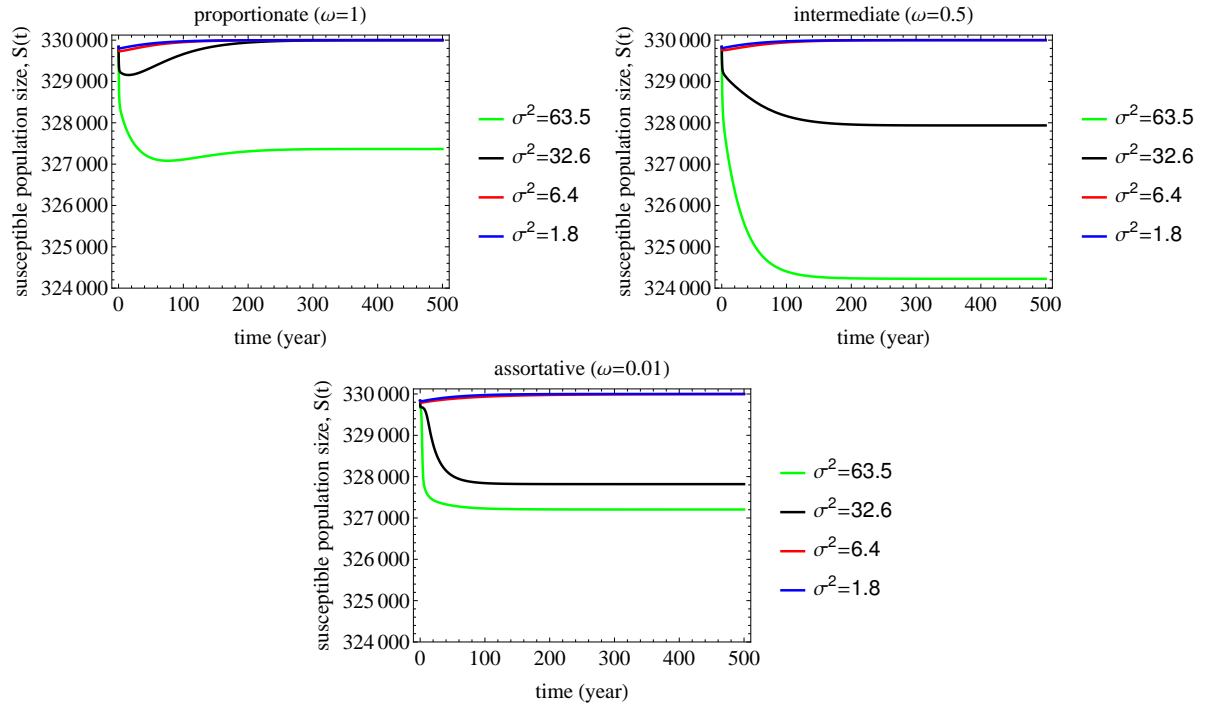

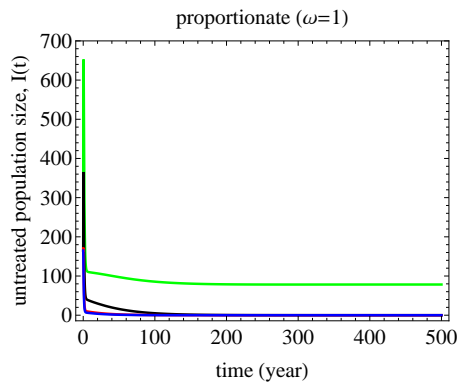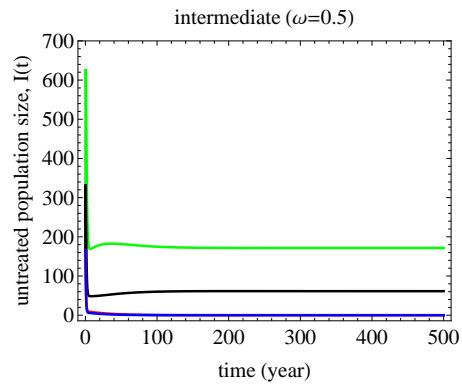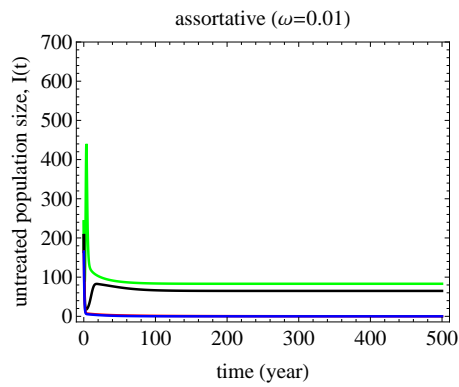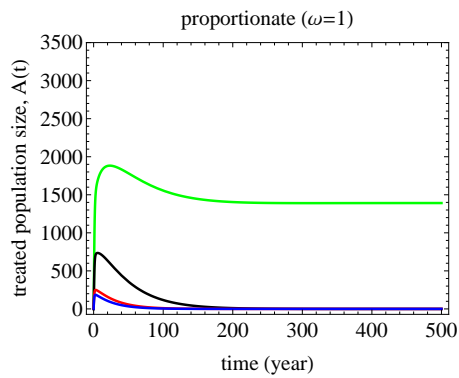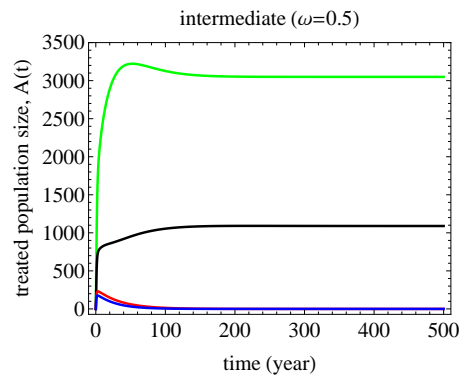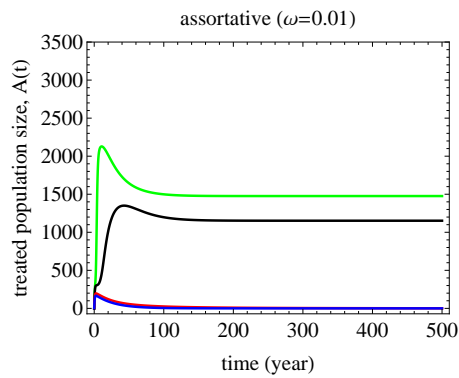

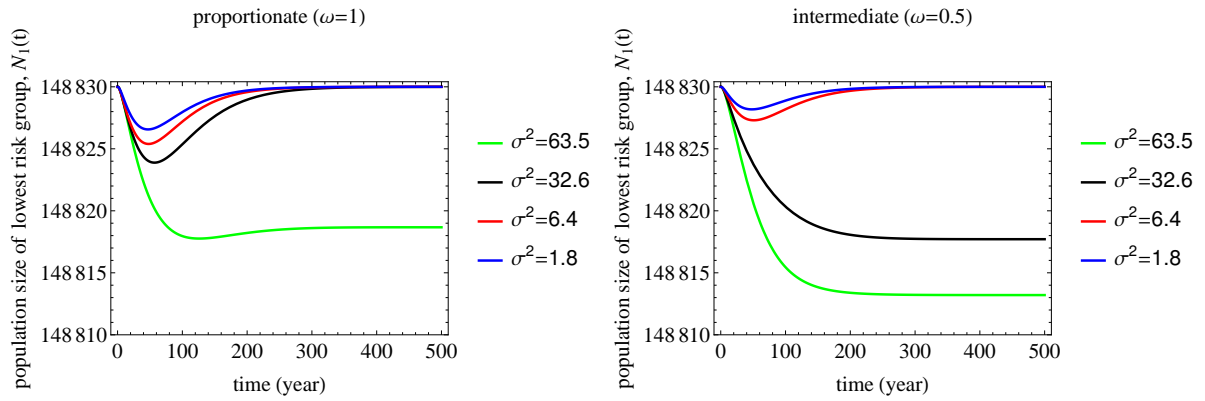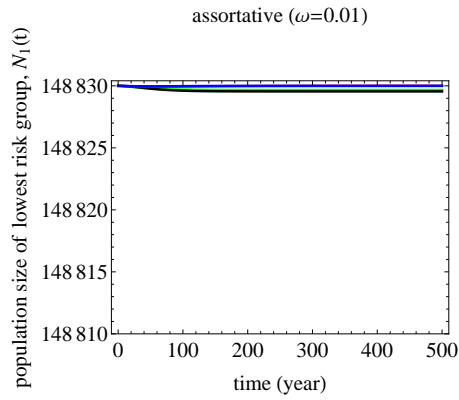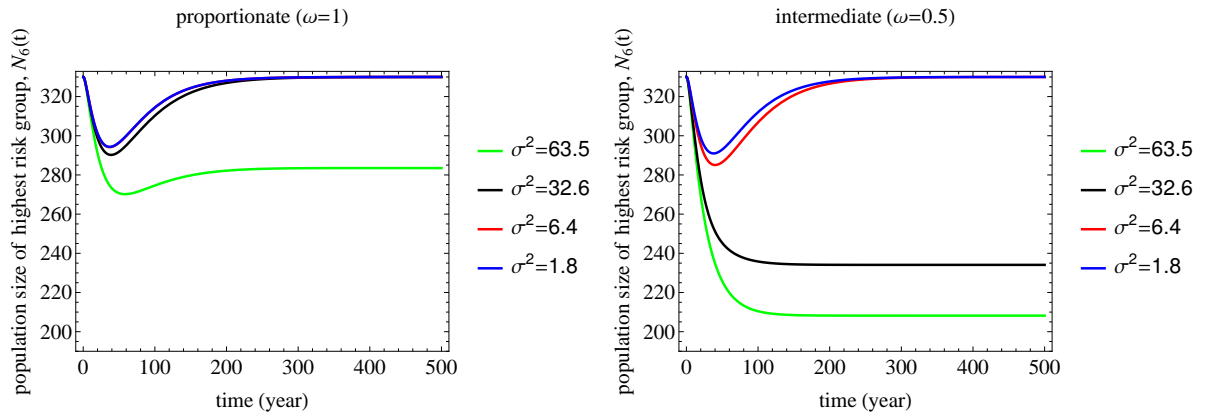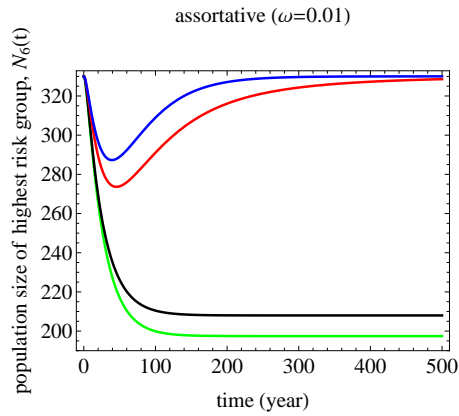

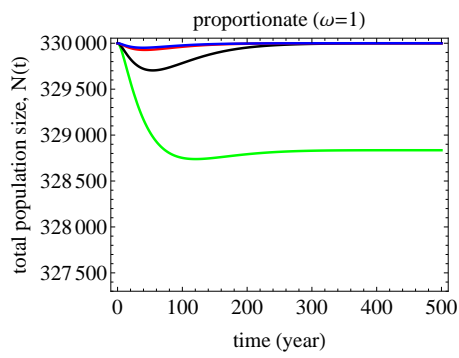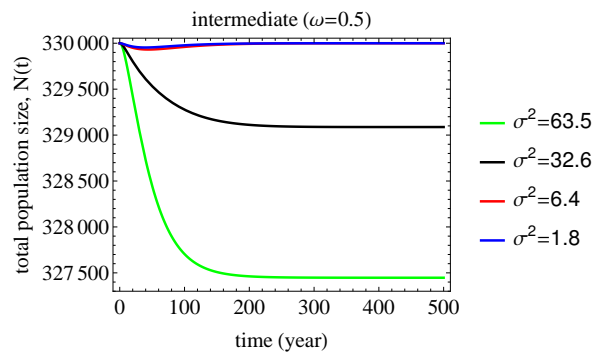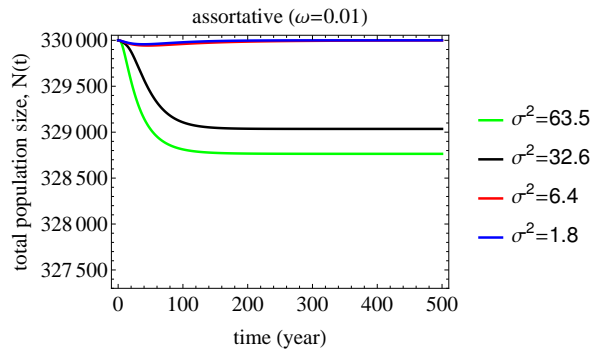

Supplement: pcbi.1005012.s003.pdf [file pcbi.1005012.s003.pdf]
