# Supplementary material for: Impact of Heterogeneity in Sexual Behavior on Effectiveness in Reducing HIV Transmission with Test-and-Treat Strategy
Source: PubMed Central journal article supplement (PMC4968843; doi:10.1371/journal.pcbi.1005012), 2016-08-01

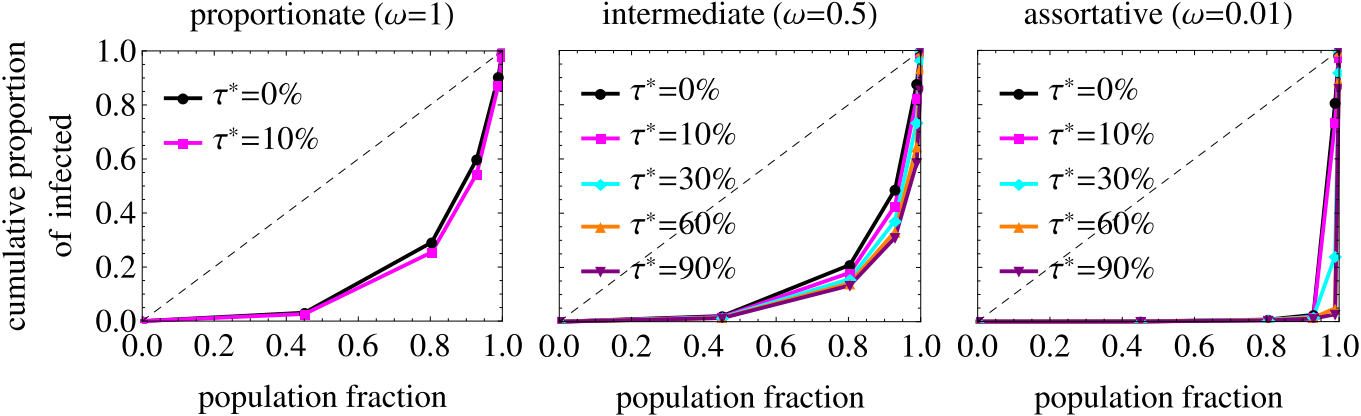

Supplement: pcbi.1005012.s007.pdf [file pcbi.1005012.s007.pdf]
