# Supplementary material for: Impact of Heterogeneity in Sexual Behavior on Effectiveness in Reducing HIV Transmission with Test-and-Treat Strategy
Source: PubMed Central journal article supplement (PMC4968843; doi:10.1371/journal.pcbi.1005012), 2016-08-01

### Effect of population stratification on the effective reproduction number.

From the fitting procedure we obtain estimates of the shape,  $\alpha = 0.497474$ , and scale,  $\beta = 1.25658$ , parameters and the mean partner change rate,  $c = 2.53686 \text{ yr}^{-1}$ . The mean rates of partner change in the 6 risk groups,  $c_l$ , where  $l = 1, \dots, 6$ , depend on the choice of initial population fractions,  $q_l$ , where  $l = 1, \dots, 6$ . (A) Stratification used throughout the main text (panel A in S3 Fig): initial population fractions  $q_1 = 0.451$ ,  $q_2 = 0.353$ ,  $q_3 = 0.125$ ,  $q_4 = 0.06$ ,  $q_5 = 0.01$  and  $q_6 = 0.001$ ; partner change rates  $c_1 = 0.127469$ ,  $c_2 = 1.4348$ ,  $c_3 = 5.4394$ ,  $c_4 = 14.1953$ ,  $c_5 = 35.9707$ ,  $c_6 = 81.5467$ . (B) Equal stratification into the 6 risk groups: initial population fractions  $q_l = 1/6$ , where  $l = 1, \dots, 6$ ; partner change rates  $c_1 = 0.0130195$ ,  $c_2 = 0.10939$ ,  $c_3 = 0.376127$ ,  $c_4 = 0.994072$ ,  $c_5 = 2.5408$ ,  $c_6 = 11.1878$ . All contact rates are in units  $\text{yr}^{-1}$ . As we see the stratification into equally sized groups leads to smaller differences between contact rates in different groups. (C) Effective reproduction number as a function of mixing and treatment uptake for the population stratification used in A (solid lines) and in B (dashed lines). The solid lines are repeated from Fig. 6A in the main text. For the equally stratified population the curves are below  $R_e < 1$  for an annual treatment uptake percentage  $\tau^* > 10\%$  independently of the mixing.

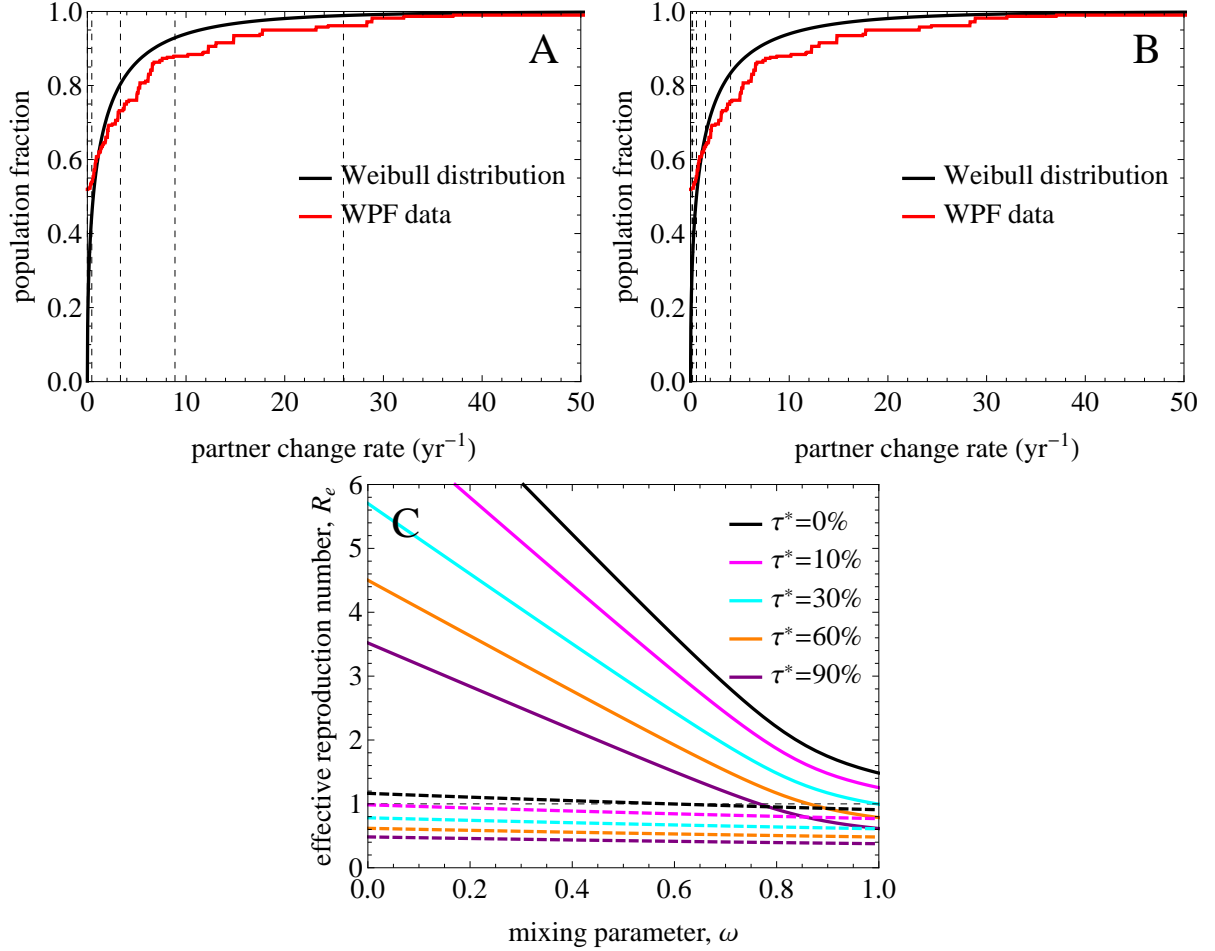

Supplement: pcbi.1005012.s009.pdf [file pcbi.1005012.s009.pdf]
