# Supplementary material for: Impact of Heterogeneity in Sexual Behavior on Effectiveness in Reducing HIV Transmission with Test-and-Treat Strategy
Source: PubMed Central journal article supplement (PMC4968843; doi:10.1371/journal.pcbi.1005012), 2016-08-01
Supplement: pcbi.1005012.s010.pdf [file pcbi.1005012.s010.pdf]

| Notation                | Baseline value, unit                                                                                               | Description                                                                  | Source                                  |
|-------------------------|--------------------------------------------------------------------------------------------------------------------|------------------------------------------------------------------------------|-----------------------------------------|
| $N_0$                   | 330 000                                                                                                            | Initial population size                                                      | (1; 2)                                  |
| $1/\mu$                 | 45 years                                                                                                           | Mean duration of sexual activity                                             | (3; 4; 5)                               |
| $\mu$                   | $1/45 \text{ yr}^{-1}$                                                                                             | Rate of recruitment to sexually active population                            | (6)                                     |
| $\rho_k, k = 1, 2, 3$   | $\rho_1 = 1/0.271 \text{ yr}^{-1}$<br>$\rho_2 = 1/8.31 \text{ yr}^{-1}$<br>$\rho_3 = 1/1.184 \text{ yr}^{-1}$      | Rate of transition from stage $k$ to stage $k + 1$ for untreated individuals | (7; 8; 9; 10)                           |
| $\rho_4$                | $\rho_4 = 1/1.316 \text{ yr}^{-1}$                                                                                 | Disease related mortality for untreated individuals                          |                                         |
| $\gamma_k, k = 1, 2, 3$ | $\gamma_1 = 1/8.21 \text{ yr}^{-1}$<br>$\gamma_2 = 1/54.0 \text{ yr}^{-1}$<br>$\gamma_3 = 1/2.463 \text{ yr}^{-1}$ | Rate of transition from stage $k$ to stage $k + 1$ for treated individuals   | (7; 9; 11)                              |
| $\gamma_4$              | $\gamma_4 = 1/2.737 \text{ yr}^{-1}$                                                                               | Disease related mortality for treated individuals                            |                                         |
| $h_k, k = 1, 2, 3, 4$   | $h_1 = 2.76$<br>$h_2 = 0.106$<br>$h_3 = 0.642$<br>$h_4 = 0.0$                                                      | Infectivity of untreated individuals in stage $k$ of infection               | (7; 10)                                 |
| $\epsilon$              | 0.01                                                                                                               | Infectivity of treated individuals                                           | (7; 12)                                 |
| $q_l, l = 1, \dots, 6$  | $q_1 = 0.451$<br>$q_2 = 0.353$<br>$q_3 = 0.125$<br>$q_4 = 0.06$<br>$q_5 = 0.01$<br>$q_6 = 0.001$                   | Initial population fractions in the 6 risk groups                            | (4; 5; 2)                               |
| $c$                     | $2.54 \text{ yr}^{-1}$                                                                                             | Mean partner change rate                                                     | Estimated from WPF sexual behavior data |

| Notation                    | Baseline value, unit                           | Description                                                                                              | Source                                                                     |
|-----------------------------|------------------------------------------------|----------------------------------------------------------------------------------------------------------|----------------------------------------------------------------------------|
| $c_l, l = 1, \dots, 6$      | see S2 Table                                   | Partner change rates in the 6 risk groups ( $\text{yr}^{-1}$ )                                           | Calculated from the                                                        |
| $\sigma^2$                  | see S2 Table                                   | Variance of the partner change rate ( $\text{yr}^{-2}$ )                                                 | Weibull distribution                                                       |
| $\lambda$                   | 5%                                             | Transmission probability per partnership                                                                 | Corresponds to a plausible range of $R_0$ for MSM in Western countries (7) |
| $\tau^*$                    | [0%, 100%]                                     | Annual treatment percentage for homogeneous uptake                                                       | —                                                                          |
| $\tau_l^*, l = 1, \dots, 6$ | [0%, 100%]                                     | Annual treatment percentage in group $l$ for heterogenous uptake                                         | —                                                                          |
| $\phi^*$                    | 5%                                             | Annual dropout percentage                                                                                | —                                                                          |
| $\tau$                      | $-\ln[1 - \tau^*/100\%]$<br>$\text{yr}^{-1}$   | Annual treatment uptake rate for homogeneous uptake                                                      | —                                                                          |
| $\tau_l, l = 1, \dots, 6$   | $-\ln[1 - \tau_l^*/100\%]$<br>$\text{yr}^{-1}$ | Annual treatment uptake rate by group $l$ for heterogenous uptake                                        | —                                                                          |
| $\phi$                      | $-\ln[1 - 0.05]$<br>$\text{yr}^{-1}$           | Annual dropout rate                                                                                      | —                                                                          |
| $\omega$                    | [0, 1]                                         | Mixing parameter: fully assortative mixing ( $\omega = 0$ ), fully proportionate mixing ( $\omega = 1$ ) | —                                                                          |

Table 1: Description of the parameters of the model and their baseline values.

## References

- [1] Rutgers Nisso Group, *Sexual health in the Netherlands*. Delft: Eburon, 2006.
- [2] M. Xiridou, R. van Houdt, S. Hahné, R. Coutinho, J. van Steenberg, and M. Kretzschmar, “Hepatitis B vaccination of men who have sex with men in the Netherlands: should we vaccinate more men, younger men or high-risk men?,” *Sexually Transmitted Infections*, vol. 89, pp. 666–671, 2013.
- [3] A. Johnson, J. Wadsworth, K. Wellings, and J. Field, *Sexual attitudes and lifestyles*. Oxford: Blackwell Scientific Publications, 1994.
- [4] J. R. Williams, D. J. Nokes, G. F. Medley, and R. M. Anderson, “The transmission dynamics of hepatitis B in the UK: a mathematical model for evaluating costs

- and effectiveness of immunization programmes,” *Epidemiology & Infection*, vol. 116, pp. 71–89, 1996.
- [5] R. M. Anderson, G. F. Medley, and D. J. Nokes, “Preliminary analyses of the predicted impacts of various vaccination strategies on the transmission of the hepatitis B virus,” in *Proceedings of the conference on the control of hepatitis B: the role of prevention in adolescence*, (London), pp. 95–130, 1991.
- [6] R. M. Anderson and R. M. May, *Infectious diseases of humans*. Oxford: Oxford University Press, 1991.
- [7] M. E. Kretzschmar, M. F. Schim van der Loeff, P. J. Birrell, D. De Angelis, and R. A. Coutinho, “Prospects of elimination of HIV with test-and-treat strategy,” *Proceedings of the National Academy of Sciences USA*, vol. 110, p. 1553815543, 2013.
- [8] Collaborative Group on AIDS Incubation and HIV Survival including the CASCADE EU Concerted Action. Concerted Action on SeroConversion to AIDS and Death in Europe. “Time from HIV-1 seroconversion to AIDS and death before widespread use of highly-active antiretroviral therapy: a collaborative re-analysis,” *Lancet*, vol. 355, pp. 1131–1137, 2000.
- [9] P. J. Birrell, A. M. Presanis, D. De Angelis, and The CASCADE Collaboration, “Multi-state models of HIV progression in homosexual men: an application to the CASCADE collaboration,” tech. rep., MRC Biostatistics Unit, 2012.
- [10] T. D. Hollingsworth, R. M. Anderson, and C. Fraser, “HIV-1 transmission, by stage of infection,” *Journal of Infectious Diseases*, vol. 198, pp. 687–693, 2008.
- [11] The CASCADE Collaboration. Concerted Action on SeroConversion to AIDS and Death in Europe. “Survival after introduction of HAART in people with known duration of HIV-1 infection,” *Lancet*, vol. 355, pp. 1158–1159, 2000.
- [12] R. M. Granich, C. F. Gilks, C. Dye, K. M. De Cock, and B. G. Williams, “Universal voluntary HIV testing with immediate antiretroviral therapy as a strategy for elimination of HIV transmission: a mathematical model,” *Lancet*, vol. 373, pp. 48–57, 2009.
