# Supplementary material for: Impact of Heterogeneity in Sexual Behavior on Effectiveness in Reducing HIV Transmission with Test-and-Treat Strategy
Source: PLOS journal article supplement (doi:10.1371/journal.pcbi.1005012), 2016-08-01

**Cumulative distribution function for the Weibull and Gamma distributions in the partner change rate and the empirical distribution obtained from the WPF data.** From the fitting procedure we obtain the estimates of the shape,  $\alpha$ , and scale,  $\beta$ , parameters, the mean partner change rate,  $c$ , and the mean rates in the 6 risk groups,  $c_l$ , where  $l = 1, \dots, 6$ . (A) Weibull distribution (panel A in S3 Fig):  $\alpha = 0.497474$ ,  $\beta = 1.25658$ ;  $c = 2.53686$ ,  $c_1 = 0.127469$ ,  $c_2 = 1.4348$ ,  $c_3 = 5.4394$ ,  $c_4 = 14.1953$ ,  $c_5 = 35.9707$ ,  $c_6 = 81.5467$ . (B) Gamma distribution:  $\alpha = 0.356847$ ,  $\beta = 8.50218$ ;  $c = 3.03397$ ,  $c_1 = 0.179485$ ,  $c_2 = 2.2302$ ,  $c_3 = 7.30403$ ,  $c_4 = 15.2068$ ,  $c_5 = 29.1232$ ,  $c_6 = 49.1228$ . All contact rates are in units  $\text{yr}^{-1}$ .

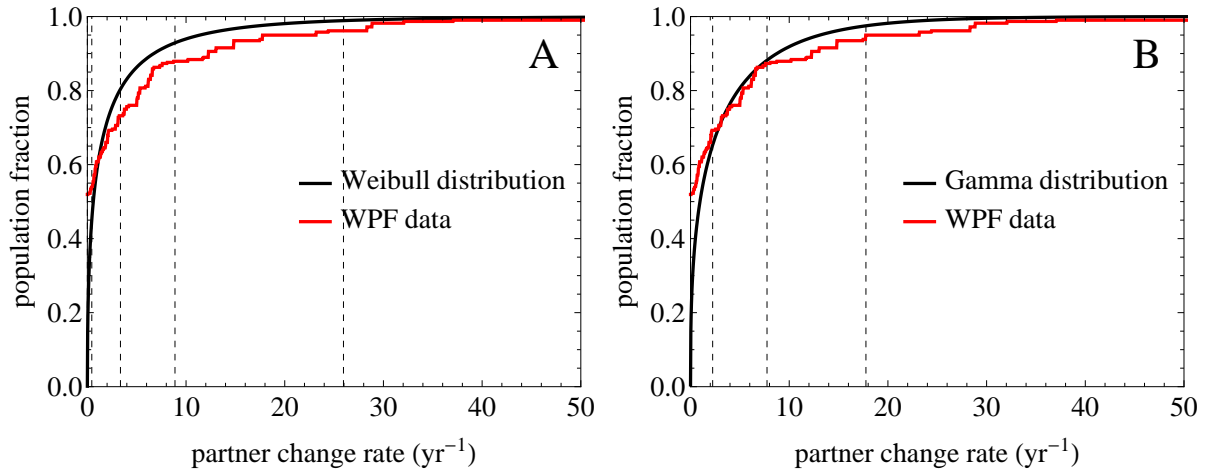

Supplement: S5 (10.1371/journal.pcbi.1005012.s005) [file journal.pcbi.1005012.s005]
